# Supplementary material for: Chemical and physical properties of low-molecular-weight poly(2,6-dimethyl-1,4-phenylene oxide) (LMW-PPO) synthesized by peroxydisulfate and metal/non-metal catalysts
Source: Royal Society of Chemistry journal article supplement (doi:10.1039/d2py01614a), 2023-01-01
Supplement: d2py01614a1.pdf [file d2py01614a1.pdf]

# Supporting Information

## Chemical and physical properties of low-molecular-weight poly(2,6-dimethyl-1,4-phenylene oxide) (LMW-PPO) synthesized by peroxydisulfate and metal/non-metal catalysts

Yi-Fang Lu<sup>a</sup>, Song-Hai Wu<sup>a</sup>, Cong Wang<sup>b</sup>, Yong Liu<sup>c</sup>, Fu-Gen Huang<sup>d</sup>, Bao-Dong Song<sup>a,\*</sup> and Xu Han<sup>a,\*</sup>

<sup>a</sup> Tianjin Key Laboratory of Chemical Process Safety and Equipment Technology, School of Chemical Engineering and Technology, Tianjin University, Tianjin 300350, P.R. China

<sup>b</sup> Hebei Key Laboratory of Hazardous Chemicals Safety and Control Technology, School of Chemical and Environmental Engineering, North China Institute of Science and Technology, Langfang 065201, Hebei, P.R. China

<sup>c</sup> School of Chemistry and Chemical Engineering, Tianjin University of Technology, Tianjin 300384, P.R. China

<sup>d</sup> Industrial Resources BU, Sinochem International Corporation, Beijing 100045, P.R. China

\*Corresponding Author

Telephone: [+86-13920225599](tel:+86-13920225599)

E-mail address: [bdsong@tju.edu.cn](mailto:bdsong@tju.edu.cn)

\*Corresponding Author

Telephone: [+86-15222072695](tel:+86-15222072695)

E-mail address: [xuhan@tju.edu.cn](mailto:xuhan@tju.edu.cn)

**Table S1.** The influence of solvents on the yields of PPO and DPQ.<sup>a</sup>

| Entry | Solvent                                       | PPO yield/% | DPQ yield/% |
|-------|-----------------------------------------------|-------------|-------------|
| 1     | H <sub>2</sub> O                              | 42.3        | 15.2        |
| 2     | H <sub>2</sub> O/CH <sub>3</sub> CN (v/v=1/1) | 61.6        | 5.1         |

<sup>a</sup> Polymerization was carried out by PDS and CuCl<sub>2</sub>-MSPDC catalyst in the air.

**Table S2.** The dielectric properties of PPO.

|                                  | Commercial PPO | Cu(I)-O <sub>2</sub> <sup>a</sup> | Cu(II)-PDS <sup>b</sup> | MSPDC-PDS <sup>c</sup> | MA-PDS <sup>d</sup> |
|----------------------------------|----------------|-----------------------------------|-------------------------|------------------------|---------------------|
| <i>D</i> <sub>κ</sub> (at 1 GHz) | 2.45           | 2.74                              | 2.61                    | 2.42                   | 2.32                |
| <i>D</i> <sub>f</sub> (at 1 GHz) | 0.00174        | 0.00528                           | 0.00307                 | 0.00171                | 0.00132             |

<sup>a</sup> PPO was synthesized in the O<sub>2</sub> atmosphere in toluene by CuCl-amine catalyst;

<sup>b</sup> PPO was synthesized in the mixture of CH<sub>3</sub>CN/H<sub>2</sub>O (v/v=9/1) by PDS and CuCl<sub>2</sub>-MSPDC catalyst;

<sup>c</sup> PPO was synthesized in the mixture of CH<sub>3</sub>CN/H<sub>2</sub>O (v/v=9/1) by PDS and MSPDC catalyst;

<sup>d</sup> PPO was synthesized in the mixture of CH<sub>3</sub>CN/H<sub>2</sub>O (v/v=9/1) by PDS and MA catalyst.

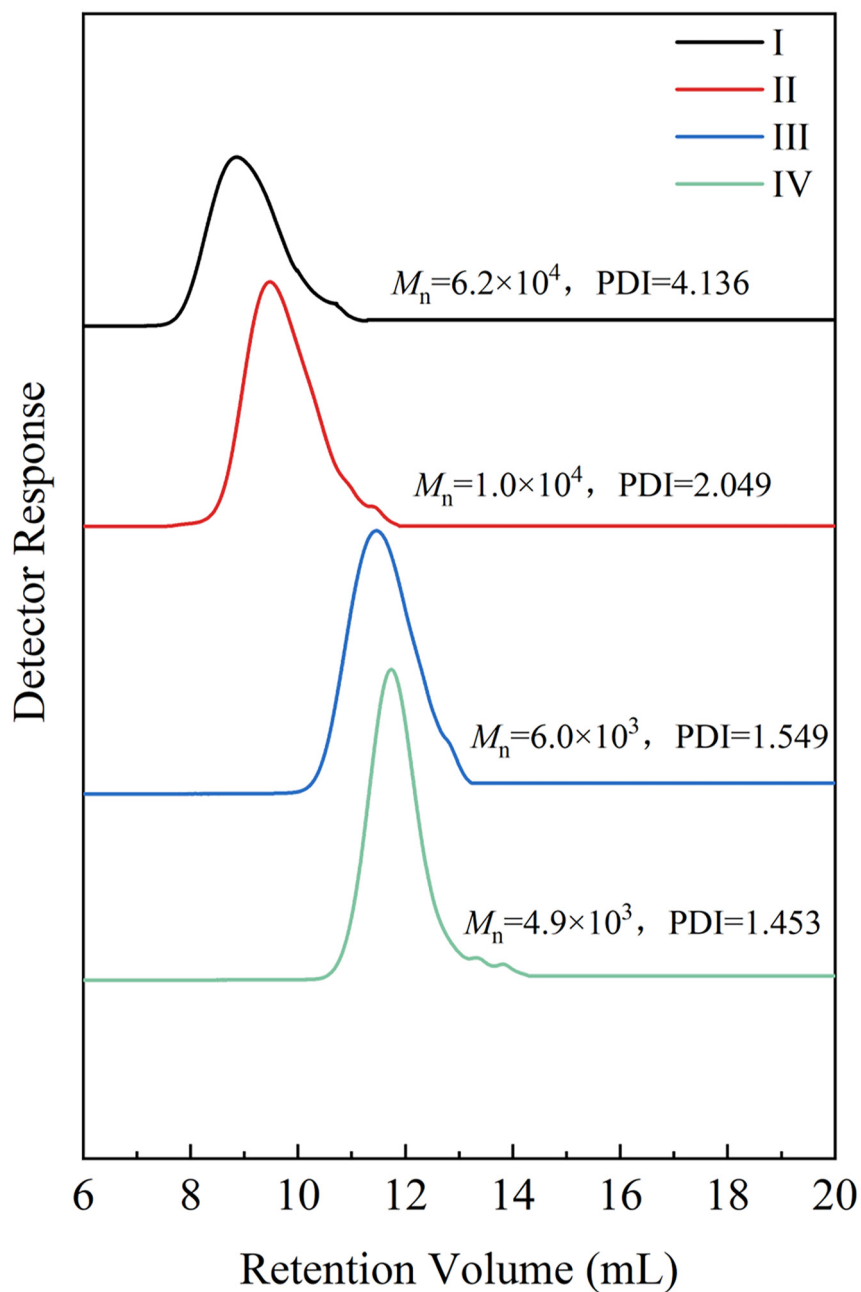

**Figure S1.** GPC traces of the obtained PPO. I and II were synthesized in the O<sub>2</sub> atmosphere in toluene by CuCl-amine catalyst with the respective molar ratios of PDS:DMP of 0 and 1:1; III was synthesized in the mixture of CH<sub>3</sub>CN/H<sub>2</sub>O (v/v=9/1) by PDS and CuCl<sub>2</sub>-MSPDC; and IV was synthesized in the mixture of CH<sub>3</sub>CN/H<sub>2</sub>O (v/v=9/1) by PDS and MSPDC catalyst.

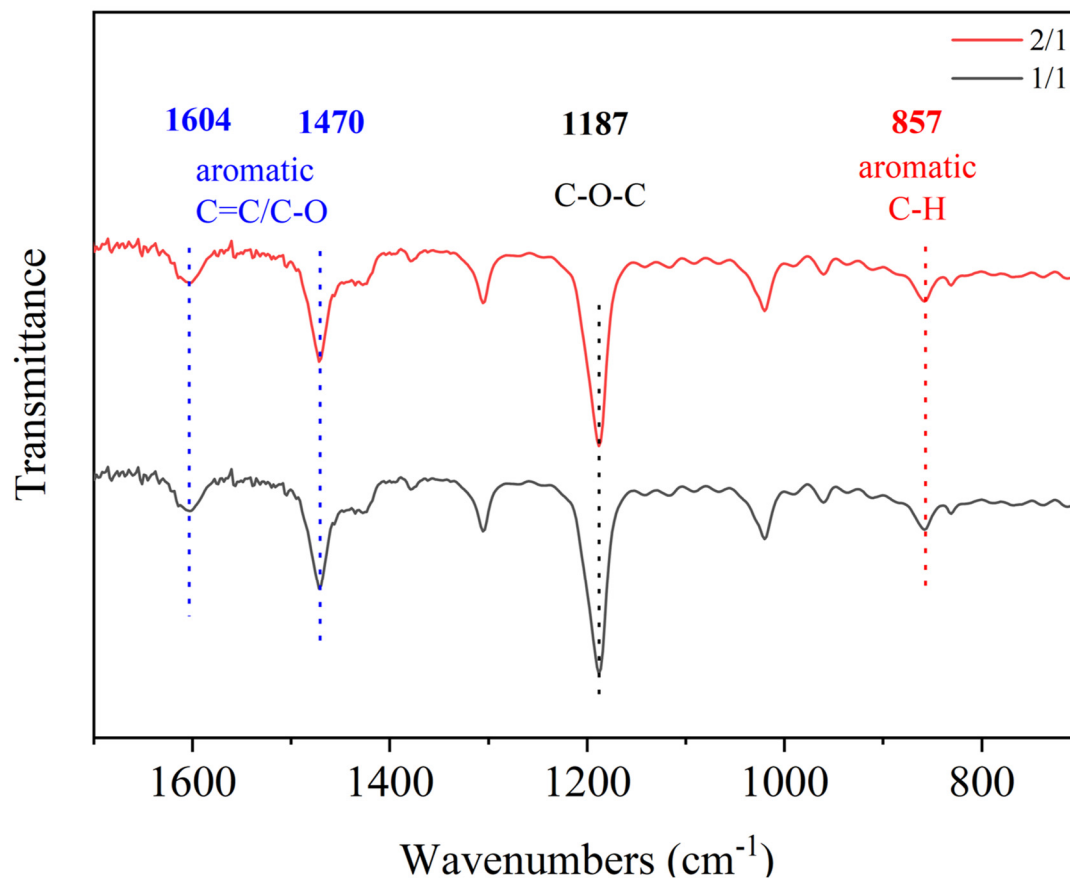

**Figure S2.** FTIR spectra of the obtained PPO synthesized in the mixture of  $\text{CH}_3\text{CN}/\text{H}_2\text{O}$  ( $v/v=9/1$ ) by PDS and  $\text{CuCl}_2$ -MSPDC catalyst with different molar ratios of PDS:DMP (2:1 and 1:1).

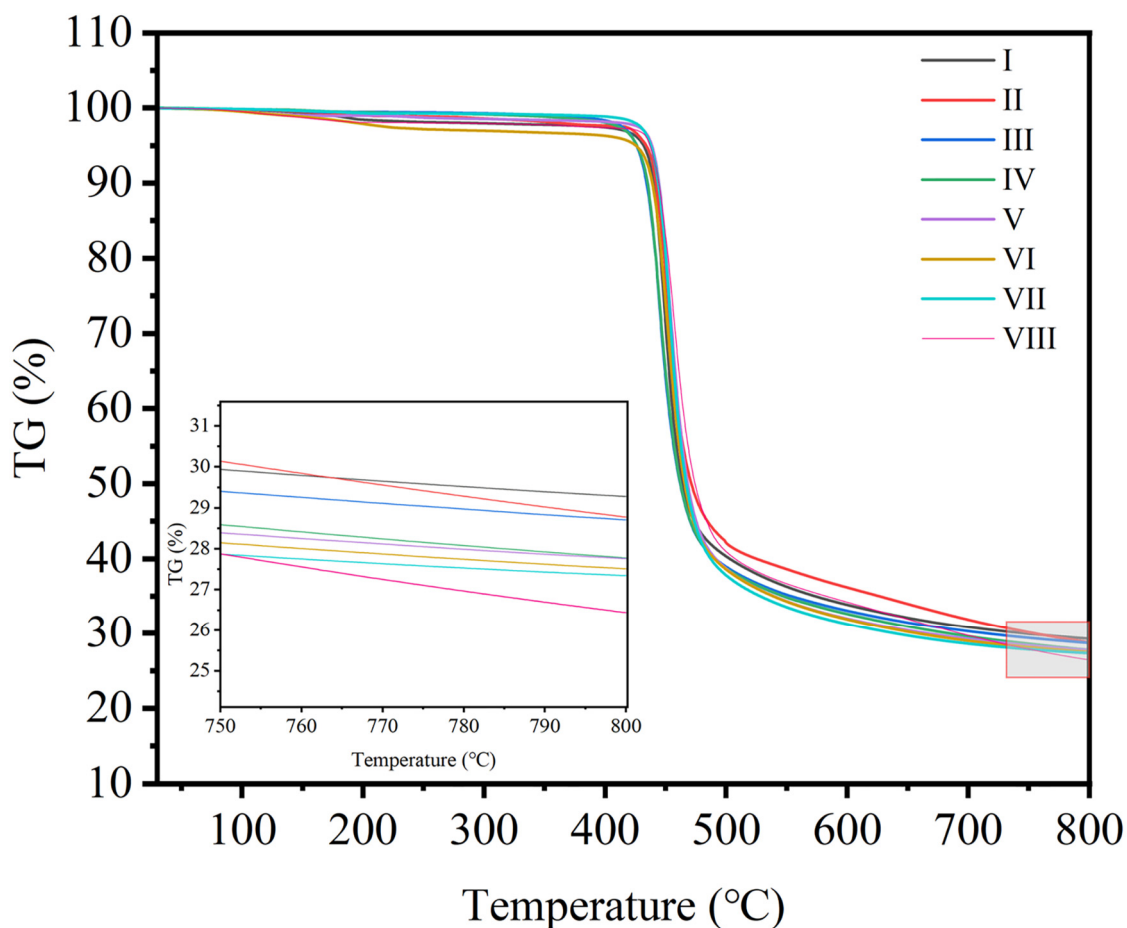

**Figure S3.** TGA curves of the obtained PPO. I-V: PPO synthesized in the O<sub>2</sub> atmosphere in toluene by CuCl-amine catalyst with the respective molar ratio of PDS:DMP (0, 1:8, 1:4, 1:2 and 1:1), [DMP]=0.2 M, [CuCl]=50 mM, [amine]=0.2 M, temperature: 25°C, time: 2 h; VI: PPO synthesized in the mixture of CH<sub>3</sub>CN/H<sub>2</sub>O (v/v=9/1) with PDS and CuCl<sub>2</sub>-MSPDC catalyst, [DMP]=50 mM, [PDS]=50 mM, [CuCl<sub>2</sub>]=5 mM, [MSPDC]=0.05 M, temperature: 50°C, time: 2 h; VII and VIII: PPO synthesized in the mixture of CH<sub>3</sub>CN/H<sub>2</sub>O (v/v=9/1) by PDS and metal-free catalyst, [DMP]=50 mM, [PDS]=50 mM, temperature: 25°C, time: 2 h, VII: [MSPDC]=5 mM, VIII: MA/CH<sub>3</sub>CN/H<sub>2</sub>O (v/v/v=2/7/1).
